# Supplementary material
Source: PubMed Central journal article supplement (PMC5499359)
Supplement: jciinsight-2-94532-s001.pdf [file jciinsight-2-94532-s001.pdf]

|          |          | CH1 |     |     |     | Hinge |    |    |    | CH2 |     |     |     | CH3 |     |     |     |     |     |     |     | SoBio |     |     |     | Sanquin |     |     |             | Sanquin |    |    |             | Binding Site |     |    |             |   |   |   |             |   |   |   |   |
|----------|----------|-----|-----|-----|-----|-------|----|----|----|-----|-----|-----|-----|-----|-----|-----|-----|-----|-----|-----|-----|-------|-----|-----|-----|---------|-----|-----|-------------|---------|----|----|-------------|--------------|-----|----|-------------|---|---|---|-------------|---|---|---|---|
|          |          | 176 | 189 | 192 | 214 | H1    | H2 | H3 | H4 | 282 | 291 | 292 | 296 | 309 | 339 | 356 | 358 | 378 | 379 | 384 | 392 | 397   | 409 | 419 | 422 | 431     | 435 | 456 | Mouse anti- |         |    |    | Mouse anti- |              |     |    | Sheep anti- |   |   |   | Sheep anti- |   |   |   |   |
|          |          | G1  | G2  | G3  | G4  | G1    | G2 | G3 | G4 | G1  | G2  | G3  | G4  | G1  | G2  | G3  | G4  | G1  | G2  | G3  | G4  | G1    | G2  | G3  | G4  | G1      | G2  | G3  | G4          | G1      | G2 | G3 | G4          | G1           | G2  | G3 | G4          |   |   |   |             |   |   |   |   |
| IgG1     | IGHG1*01 | S   | P   | S   | L   | K     |    |    |    |     | V   | P   | R   | Y   | L   | A   | D   | L   | A   | V   | N   | K     | V   | K   | Q   | V       | A   | H   | Y           | +/-     | -  | -  | -           | +            | -   | -  | -           | + | - | - | -           | + | - | - | - |
|          | IGHG1*03 | S   | P   | S   | L   | R     |    |    |    |     | V   | P   | R   | Y   | L   | A   | E   | M   | A   | V   | N   | K     | V   | K   | Q   | V       | A   | H   | Y           | +/-     | -  | -  | -           | +            | -   | -  | -           | + | - | - | -           | + | - | - | - |
|          | IGHG1*04 | S   | P   | S   | L   | K     |    |    |    |     | V   | P   | R   | Y   | L   | A   | D   | L   | A   | V   | N   | K     | V   | K   | Q   | I       | A   | H   | Y           | +/-     | -  | -  | -           | +            | -   | -  | -           | + | - | - | -           | + | - | - | - |
|          | IGHG1*05 | S   | P   | S   | L   | K     |    |    |    |     | V   | P   | R   | Y   | L   | A   | D   | L   | A   | V   | N   | K     | V   | K   | Q   | V       | A   | R   | Y           | +/-     | -  | -  | -           | +            | -   | -  | -           | + | - | + | -           | + | - | + | - |
|          | IGHG1*06 | S   | P   | S   | L   | K     |    |    |    |     | V   | P   | R   | Y   | L   | A   | D   | L   | A   | V   | N   | K     | V   | K   | Q   | I       | A   | R   | Y           | +/-     | -  | -  | -           | +            | -   | -  | -           | + | - | + | -           | + | - | + | - |
|          | IGHG1*07 | S   | P   | S   | L   | K     |    |    |    |     | V   | P   | R   | Y   | L   | A   | D   | L   | A   | V   | N   | K     | V   | K   | Q   | V       | G   | H   | Y           | +/-     | -  | -  | -           | +            | -   | -  | -           | + | - | - | -           | + | - | - | - |
|          | IGHG1*08 | S   | P   | S   | L   | R     |    |    |    |     | V   | P   | R   | Y   | L   | A   | D   | L   | A   | V   | N   | K     | V   | K   | Q   | V       | A   | H   | Y           | +/-     | -  | -  | -           | +            | -   | -  | -           | + | - | - | -           | + | - | - | - |
| IgG2     | IGHG2*01 | S   | P   | N   | F   | T     |    |    |    |     | V   | P   | R   | F   | V   | T   | E   | M   | A   | V   | N   | K     | M   | K   | Q   | V       | A   | H   | Y           | -       | +  | -  | -           | -            | +/- | -  | -           | - | + | - | -           | - | + | - | - |
|          | IGHG2*02 | S   | T   | N   | F   | T     |    |    |    |     | M   | P   | R   | F   | V   | T   | E   | M   | A   | V   | N   | K     | M   | K   | Q   | V       | A   | H   | Y           | -       | +  | -  | -           | -            | +/- | -  | -           | - | + | - | -           | - | + | - | - |
|          | IGHG2*04 | S   | P   | S   | L   | T     |    |    |    |     | V   | P   | R   | F   | V   | T   | E   | M   | A   | V   | N   | K     | M   | K   | Q   | V       | A   | H   | Y           | -       | +  | -  | -           | -            | +/- | -  | -           | - | + | - | -           | - | + | - | - |
|          | IGHG2*06 | S   | P   | N   | F   | T     |    |    |    |     | V   | P   | R   | F   | V   | T   | E   | M   | S   | V   | N   | K     | M   | K   | Q   | V       | A   | H   | Y           | -       | +  | -  | -           | -            | +/- | -  | -           | - | + | - | -           | - | + | - | - |
| IgG3     | IGHG3*01 | S   | P   | S   | L   | R     | +  | +  | +  | +   | V   | P   | R   | Y   | L   | T   | E   | M   | A   | V   | S   | N     | M   | K   | Q   | I       | A   | R   | F           | -       | -  | +  | -           | -            | -   | +  | -           | - | - | + | -           | - | - | + | - |
|          | IGHG3*03 | S   | P   | S   | L   | R     | +  | +  | +  | +   | V   | P   | R   | Y   | L   | T   | E   | M   | A   | V   | S   | N     | V   | R   | E   | V       | A   | R   | F           | -       | -  | +  | -           | -            | -   | +  | -           | - | - | + | -           | - | - | + | - |
|          | IGHG3*04 | S   | P   | S   | L   | R     | +  |    | +  | +   | V   | P   | R   | Y   | L   | T   | E   | M   | A   | V   | S   | N     | M   | K   | Q   | I       | A   | R   | F           | -       | -  | -  | -           | -            | -   | -  | -           | - | - | + | -           | - | - | + | - |
|          | IGHG3*06 | S   | P   | S   | L   | R     | +  | +  | +  | +   | V   | P   | R   | Y   | L   | T   | E   | M   | A   | V   | S   | K     | M   | K   | Q   | I       | A   | R   | F           | -       | -  | +  | -           | -            | -   | +  | -           | - | - | + | -           | - | - | + | - |
|          | IGHG3*08 | S   | P   | S   | L   | R     | +  | +  | +  | +   | V   | P   | R   | Y   | L   | T   | E   | M   | A   | V   | N   | N     | M   | K   | Q   | I       | A   | R   | F           | -       | -  | +  | -           | -            | -   | +  | -           | - | - | + | -           | - | - | + | - |
|          | IGHG3*09 | S   | P   | S   | L   | R     | +  | +  | +  | +   | V   | P   | R   | Y   | V   | T   | E   | M   | A   | V   | S   | N     | M   | K   | Q   | I       | A   | R   | F           | -       | -  | +  | -           | -            | -   | +  | -           | - | + | + | -           | - | + | + | - |
|          | IGHG3*11 | S   | P   | S   | L   | R     | +  | +  | +  | +   | V   | P   | R   | F   | L   | T   | E   | M   | A   | V   | S   | N     | M   | K   | Q   | I       | A   | R   | F           | -       | -  | +  | -           | -            | -   | +  | -           | - | - | + | -           | - | - | + | - |
|          | IGHG3*12 | S   | P   | S   | L   | R     | +  | +  | +  | +   | V   | P   | R   | F   | L   | T   | E   | M   | A   | V   | S   | N     | M   | K   | Q   | I       | A   | R   | F           | -       | -  | +  | -           | -            | -   | +  | -           | - | - | + | -           | - | - | + | - |
|          | IGHG3*13 | S   | P   | S   | L   | R     | +  | +  | +  | +   | V   | P   | R   | Y   | L   | T   | E   | M   | A   | V   | S   | K     | M   | K   | E   | I       | A   | R   | F           | -       | -  | +  | -           | -            | -   | +  | -           | - | - | + | -           | - | - | + | - |
|          | IGHG3*14 | S   | P   | S   | L   | R     | +  | +  | +  | +   | V   | L   | R   | Y   | L   | T   | E   | M   | A   | V   | N   | N     | M   | K   | Q   | I       | A   | R   | Y           | -       | -  | +  | -           | -            | -   | +  | -           | - | - | + | -           | - | - | + | - |
|          | IGHG3*15 | S   | P   | S   | L   | R     | +  | +  | +  | +   | V   | L   | R   | Y   | L   | T   | E   | M   | A   | V   | N   | K     | M   | K   | Q   | I       | A   | R   | Y           | -       | -  | +  | -           | -            | -   | +  | -           | - | - | + | -           | - | - | + | - |
|          | IGHG3*16 | S   | P   | S   | L   | R     | +  | +  | +  | +   | V   | L   | R   | Y   | L   | A   | E   | M   | A   | V   | N   | N     | M   | K   | Q   | I       | A   | R   | Y           | -       | -  | +  | -           | -            | -   | +  | -           | - | - | + | -           | - | - | + | - |
|          | IGHG3*17 | S   | P   | N   | F   | R     | +  | +  | +  | +   | V   | P   | R   | Y   | L   | T   | E   | M   | A   | M   | S   | K     | V   | K   | Q   | I       | A   | H   | Y           | -       | -  | +  | -           | -            | -   | +  | -           | - | - | + | -           | - | - | + | - |
| IGHG3*18 | Y        | P   | S   | L   | R   | +     | +  | +  | +  | V   | P   | W   | Y   | L   | T   | E   | M   | A   | M   | S   | K   | V     | K   | Q   | I   | A       | H   | Y   | -           | -       | +  | -  | -           | -            | +   | -  | -           | - | + | - | -           | - | + | - |   |
| IGHG3*19 | S        | P   | S   | L   | R   | +     | +  | +  | +  | V   | P   | W   | Y   | L   | T   | E   | M   | A   | M   | S   | K   | V     | K   | Q   | I   | A       | H   | Y   | -           | -       | +  | -  | -           | -            | +   | -  | -           | - | + | - | -           | - | + | - |   |
| IgG4     | IGHG4*01 | S   | P   | S   | L   | R     |    |    |    |     | V   | P   | R   | F   | L   | A   | E   | M   | A   | V   | N   | K     | V   | R   | E   | V       | A   | H   | Y           | -       | -  | -  | +           | -            | -   | -  | +           | - | - | - | +           | - | - | - | + |
|          | IGHG4*02 | S   | P   | S   | L   | R     |    |    |    |     | V   | P   | R   | F   | V   | A   | E   | M   | A   | V   | N   | K     | V   | R   | E   | V       | A   | H   | Y           | -       | -  | -  | +           | -            | -   | -  | +           | - | + | - | +           | - | + | - | + |
|          | IGHG4*03 | S   | P   | S   | L   | R     |    |    |    |     | V   | P   | R   | F   | L   | A   | E   | M   | A   | V   | N   | K     | V   | K   | E   | V       | A   | H   | Y           | -       | -  | -  | +           | -            | -   | -  | +           | - | - | - | +           | - | - | - | + |

**Table S1. Human IgG isoallotype genetic variation and reactivities to anti-IgG subclass reagents.** Canonical sequences for each IgG subclass are shown in light blue, with all known intra-subclass variants shown below each canonical sequence. Reactivity with each anti-IgG subclass specific antibody is shown to the right, with blind spots (and their corrections) shown in red, and cross-reactive antibodies (and their corrections) shown in blue. \*For clarity, variant amino acids that differ between IgG subclasses but that do not vary within a subclass (ie isoallotype) are not shown. For a more comprehensive view of all known amino acid differences between the 29 isoallotypes please see (21)
